# Supplementary figures and images for: Cascading and precise regulation of the selective bio-production of 2- or 5-ketogluconic acid from glucose with whole-cell catalysis technology
Source: Royal Society of Chemistry journal article supplement (doi:10.1039/d2gc04566d), 2023-01-01

**Figure S1**

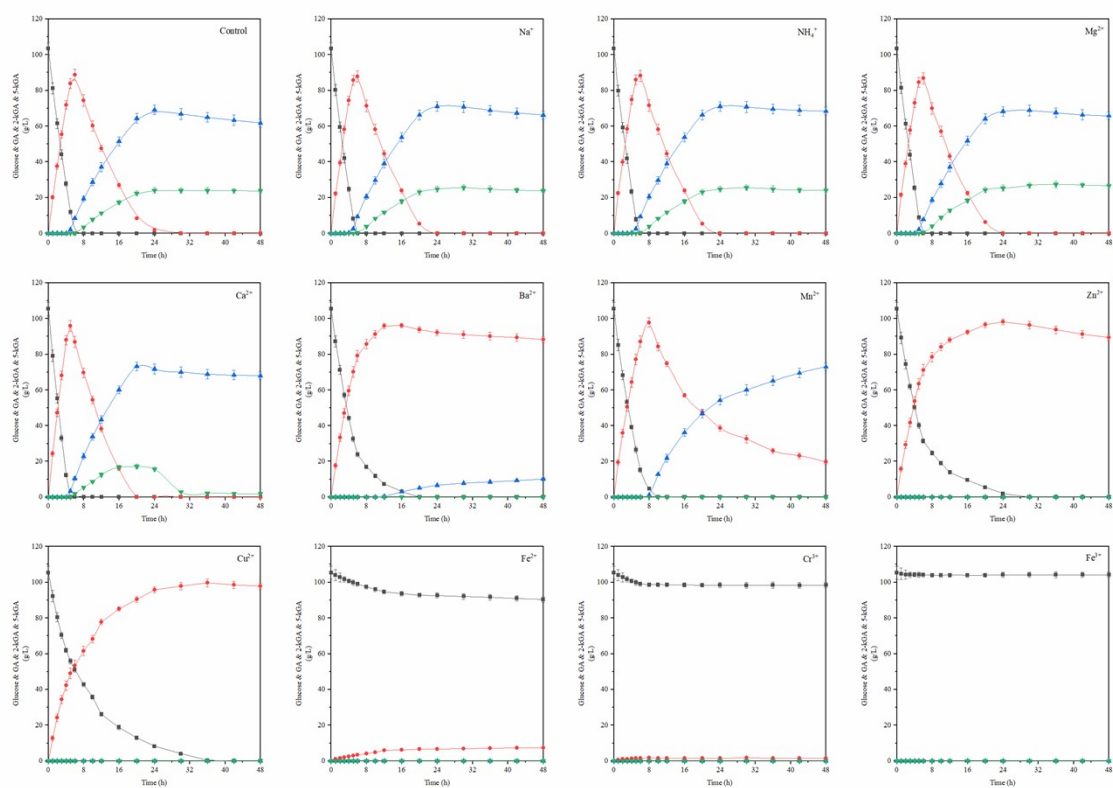

Supplement: d2gc04566d1.pdf [file d2gc04566d1.pdf]
